1    **Calcium-vesicles perform active diffusion in the sea urchin embryo**  
2    **during larval biomineralization**

3    Mark R. Winter<sup>1</sup>, Miri Morgulis<sup>1</sup>, Tsvia Gildor<sup>1</sup>, Andrew R. Cohen<sup>2</sup> and \*Smadar Ben-Tabou de-  
4    Leon<sup>1</sup>

5    <sup>1</sup>Marine Biology Department, Charney School of Marine Sciences, the University of Haifa, Haifa,  
6    Israel

7    <sup>2</sup>Drexel University, PA, USA

8    \*Author of correspondence, e-mail: [sben-tab@univ.haifa.ac.il](mailto:sben-tab@univ.haifa.ac.il) phone: +972-52-6135770

9

10   **Calcium-vesicle diffusion in biomineralization**

11

12 **ABSTRACT (<300 words)**

13 Biom mineralization is the process by which organisms use minerals to harden their tissues and  
14 provide them with physical support. Biom mineralizing cells concentrate the mineral in vesicles that  
15 they secrete into a dedicated compartment where crystallization occurs. The dynamics of mineral-  
16 vesicle motion and the molecular mechanisms that regulate it, are not well understood. Sea urchin  
17 larval skeletogenesis provides an excellent platform for the analyses of vesicle kinetics. Here we  
18 used calcein labeling and lattice light-sheet microscopy to investigate the three-dimensional (3D)  
19 vesicle dynamics in control sea urchin embryos and in Vascular Endothelial Growth Factor  
20 Receptor (VEGFR) inhibited embryos, where skeletogenesis is blocked. We developed  
21 computational tools for displaying 3D-volumetric movies and for automatically quantifying  
22 vesicle dynamics in the different embryonic tissues. Our findings imply that calcium vesicles  
23 perform an active diffusion motion in all the cells of the embryo. This mode of diffusion is  
24 defined by the mechanical properties of the cells and the dynamic rearrangements of the  
25 cytoskeletal network. The diffusion coefficient is larger in the mesenchymal skeletogenic cells  
26 compared to the epithelial ectodermal cells, possibly due to the distinct mechanical properties of  
27 the two tissues. Vesicle motion is not directed toward the biom mineralization compartment, but the  
28 vesicles slow down when they approach it, and probably bind for mineral deposition. Under  
29 VEGFR inhibition, vesicle volume increases and vesicle speed is reduced but the vesicles  
30 continue in their diffusive motion. Overall, our studies provide an unprecedented view of calcium  
31 vesicle 3D-dynamics and illuminate possible molecular mechanisms that control vesicle  
32 dynamics and deposition.

33

34 **Authors summary (150-200 words)**

35 Biom mineralization is a widespread, fundamental process by which organisms use minerals to  
36 harden their tissues. Mineral bearing vesicles were observed in biomineralizing cells and believed  
37 to play an essential role in biomineralization, yet little is known about their three-dimensional  
38 (3D) dynamics. Here we quantify 3D-vesicle-dynamics during skeleton formation in sea urchin  
39 larvae, using lattice-light-sheet microscopy. We discover that calcium vesicles perform an active  
40 diffusive motion in both calcifying and non-calcifying cells of the embryo. The motion of the  
41 vesicles in the calcifying skeletogenic cells, is not directed toward the biomineralization  
42 compartment and has a diffusion coefficient of  $\sim 0.01 \mu\text{m}^2/\text{sec}$  and average speed of  $\sim 0.09 \mu\text{m}/$   
43  $\text{sec}$ . The inhibition of Vascular Endothelial Growth Factor Receptor (VEGFR) that blocks  
44 skeletogenesis, increases vesicle volume and decreases vesicle speed but doesn't change the  
45 diffusion mode in the embryo cells. Our studies reveal the diffusive motion of mineral bearing  
46 vesicles and have implications on basic and translational research.

47

48 Biom mineralization; biophysics; Lattice light sheet microscopy; vesicles trafficking; active  
49 diffusion; sea urchin; VEGF

50

## 51 **Introduction**

52 Organisms from the five kingdoms of life use different minerals to harden their tissues and gain  
53 protection and physical support[1]. The ability of the cells to control the time and place of crystal  
54 nucleation as well as crystal orientation, elasticity and stiffness is beyond the state-of-the art of  
55 human technologies[2-4] and inspired the design of biomimetic systems[5-7]. Biomineralization  
56 is thought to have evolved independently and rapidly in different phyla, through the use of  
57 preexisting components and the evolution of specialized biomineralization proteins[8, 9]. The  
58 biomineralized skeletons, teeth and shells, constitute the fossil record that carry the information  
59 on the evolution of life on earth. Thus, revealing the cellular and molecular control of the  
60 biomineralization process has been the desired goal of both fundamental and applied researchers  
61 in the fields of biology, chemistry, geology and material sciences[1, 8-10].

62 Within the variety of minerals used and phylum specific proteins, a common design of mineral  
63 uptake and deposition emerges from various studies: the mineral enters the cells through  
64 endocytosis of extracellular fluid[11, 12]. The mineral is then concentrated and maintained in an  
65 amorphous phase in intracellular vesicles until the vesicles are deposited into a dedicated  
66 compartment where crystallization occurs[13]. The biomineralization compartment provides a  
67 highly regulated environment for crystal nucleation and growth. The molecular mechanisms that  
68 regulate the accumulation and trafficking of mineral vesicles and those that control vesicle  
69 secretion into the biomineralization compartment, are not well understood.

70 Sea urchin larval skeletogenesis is an excellent system for investigating mineral uptake and  
71 deposition within a relatively small (~100µm) and transparent embryo, which is easy to  
72 manipulate[11, 14-21]. The sea urchin skeleton is made of two rods of calcite termed “spicules”  
73 generated by the skeletogenic mesodermal cells[18, 22]. The skeletogenic cells fuse and arrange  
74 in a ring with two lateral symmetrical cell clusters. In those lateral clusters the skeletogenic cells  
75 form a tubular compartment into which calcium-carbonate is deposited to make the calcite  
76 spicules[16, 20, 21]. The uptake of calcium from the blastocoel fluid occurs through endocytosis,  
77 as was shown through a series of experiments[11, 14, 15]: Electron microscope images of the  
78 skeletogenic cells show cell membrane invagination that forms an inner pocket of about 1µm  
79 filled with blastocoel fluid[11]. This pocket then separates from the cell membrane and forms an  
80 intracellular vesicle with a similar size (~1µm)[11, 14, 15]. Calcium vesicle movement was  
81 tracked manually and the vesicles seem to barely move within the skeletogenic and ectodermal  
82 cells[15]. Calcium and carbonate are eventually concentrated in the vesicles in the form of

83 amorphous calcium-carbonate (ACC)[11, 14, 15, 23], which is deposited into the  
84 biomineralization compartment where crystallization occurs[14, 20, 24, 25].

85 The regulation of endocytosis and vesicular transport between membrane-bound cellular  
86 compartments were intensively studied in other systems[26, 27]. The observed size of the pocket  
87 and vesicles (~1 $\mu$ m) suggests that this endocytosis process is most likely macropinocytosis (“cell  
88 drinking”), and not receptor/clathrin mediated endocytosis (upper limit of ~200nm)[26] or  
89 caveolin mediated (upper limit of ~80nm)[28]. Macropinocytosis is an actin-dependent process  
90 that initiates from surface membrane ruffles that give rise to large endocytic vacuoles called  
91 macropinosomes[29]. The macropinosomes go through a maturation process that involves  
92 shrinking and coating with various membrane-bound proteins[30, 31]. Some of the membrane-  
93 bound proteins could be motor proteins like dynein or kinesin that actively transport vesicles  
94 along the microtubules in the cells[32, 33]. Alternatively, the vesicles can perform a diffusive  
95 motion that is constrained by the cellular organelles and affected by the dynamic remodeling of  
96 the cytoskeleton network within the cell[34-37]. This mode of vesicle diffusion within the cells is  
97 called “active diffusion” to distinguish it from thermal diffusion[34-37]. Possibly, some of the  
98 molecular mechanisms that regulate macropinosomes shrinking and transport are used by the  
99 skeletogenic cells to concentrate the calcium and carbonate they uptake from the blastocoel and  
100 transfer it into the biomineralization compartment.

101 The molecular control of sea urchin skeletogenesis has been intensively studied resulting in a  
102 state-of-the-art model of the gene regulatory network (GRN) that controls skeletogenic cell fate  
103 specification[17, 18, 38-40]. A key control gene in this GRN encodes the Vascular Endothelial  
104 Growth Factor Receptor (VEGFR)[17, 39-41]<sup>77</sup> that in vertebrates regulates the formation of  
105 blood vessels (vascularization) and the sprouting of new blood vessels from existing ones  
106 (angiogenesis)[42]. VEGFR is exclusively expressed in the sea urchin skeletogenic cells, and its  
107 inhibition by either genetic manipulation or using the VEGFR specific inhibitor, axitinib, distorts  
108 skeletogenic cell migration and completely blocks spicule formation[17, 39, 41]<sup>77</sup>. We previously  
109 studied the cellular and molecular machinery activated by the VEGF pathway during sea urchin  
110 skeletogenesis and revealed multiple parallels to the regulation of vertebrate vascularization[17].  
111 The similarities are observed both in the upstream gene regulatory network, in the downstream  
112 effector genes and the cellular processes that VEGF signaling activates. Possibly, sea urchin  
113 skeletogenesis and vertebrate vascularization diverged from a common ancestral tubulogenesis  
114 program, uniquely co-opted for biomineralization in the echinoderm phylum.

115 VEGFR inhibition in the sea urchin embryo affects the number of calcium vesicles accumulated  
116 in the skeletogenic cells[17]. We previously studied the role of sea urchin VEGF signaling in  
117 calcium vesicle accumulation using calcein labeling in live embryos by confocal microscopy[17].  
118 We observed that calcium vesicles are still detected in the sea urchin embryo under VEGFR  
119 inhibition. However, when the spicules form in normal embryos the number of vesicles in the  
120 skeletogenic cells is higher under VEGFR inhibition compared to normal embryos. Possibly,  
121 calcium vesicles accumulate in higher numbers in the skeletogenic cells when VEGF signaling is  
122 inactive since the biomineralization compartment doesn't form and vesicles are not deposited.  
123 Yet, these measurements were based on two dimensional images, therefore they lack the  
124 volumetric information and temporal resolution required for assessing calcium vesicle volume  
125 and kinetics in the 3-dimensional (3D) cellular environment. Lattice light-sheet microscopy  
126 (LLSM) is a promising technique for the measurement and assessment of the 3D vesicle  
127 dynamics in live sea urchin embryos[43].

128 LLSM is a recent improvement in 3D fluorescence imaging[43]. Light-sheet microscopy (LSM)  
129 excites a sample using an excitation objective that is perpendicular to the imaging objective. This  
130 excitation along a "sheet" reduces the excitation time for each point in the sample, while  
131 maintaining similar resolution to confocal microscopy. Lattice light-sheet techniques extend LSM  
132 by using a lattice beam to excite the sample rather than a Gaussian beam. The lattice beam  
133 improves the spatial resolution of the excitation, as well as reduces the intensity of excitation on  
134 the sample. LLSM techniques produce high spatial and temporal resolution images, while  
135 avoiding the phototoxicity problems that are common with confocal and standard LSM. The high  
136 spatial and temporal resolutions are indispensable for capturing the motion of fast-moving  
137 subcellular structures such as the calcium vesicles. In addition, the reduced excitation of the  
138 LLSM avoids harming the cells of the embryo allowing for the long-term visualization of calcium  
139 dynamics.

140 The power of LLSM to produce fast high-resolution imaging also presents new challenges for  
141 data analysis. Single slice-based visualization often misses important structure in the 3D volume.  
142 While full 3D volumetric visualization provides a more comprehensive view of the data, it also  
143 requires a deep understanding of the image statistics in order to properly highlight structures of  
144 interest. Similar to looking through fog, image noise in 3D volumetric data visualization can  
145 obscure the structure unless the visualization parameters are tuned for each dataset. The high  
146 throughput of LLSM exacerbates these problems: the microscope can generate gigabytes of  
147 image data per minute, requiring high-performance graphics and computer hardware in order to

148 enable real-time visualization of the datasets. Therefore, manually quantifying cellular and sub-  
149 cellular dynamics in tens of 3D movies, each having hundreds of frames, is error-prone and in  
150 most cases, practically infeasible.

151 Automated analysis approaches are highly suitable for handling large 3D LLSM datasets.  
152 However, accurate computational analysis of biological image data is also an active area of  
153 research and presents additional cross-disciplinary challenges. Quantification of cellular  
154 dynamics begins with automatic identification of individual structures of interest in each frame  
155 (often referred to as segmentation). After segmentation, a tracking algorithm links the segmented  
156 structures frame-to-frame to maintain the “identity” for each object over time. Once tracking is  
157 complete, size and motion dynamics can be measured for each object and statistical comparisons  
158 can be made. Several software tools have been developed focused on automatic 3D biological  
159 image analysis[44-46]. The LEVER package is extensible and supports visualization of the  
160 vesicle tracking along with the raw image data for validation of the automated results. LEVER  
161 has previously been used for both 2D and 3D cellular dynamics quantification. As part of this  
162 work we integrated our segmentation and tracking approaches into LEVER to be used for  
163 quantifying 3D calcium vesicle dynamics[47-49].

164 Here we used LLSM to measure 3D vesicle dynamics in control and VEGFR inhibited sea urchin  
165 embryos at the gastrula stage using calcein and membrane labeling. We extended the LEVER  
166 software platform to support automatic identification and tracking of calcium vesicles in 3D and  
167 to generate interactive volumetric 3D visualization and movie capture. We applied these tools to  
168 quantify calcium vesicle dynamics within different embryonic tissues and across experimental  
169 conditions. Our studies reveal the typical length and velocity scales and the characteristic motion  
170 of calcium vesicles in the sea urchin embryonic cells and illuminate possible molecular  
171 mechanisms that control this motion.

172

## 173 **Results**

### 174 **Detecting cellular and calcium vesicle dynamics in LLSM**

175 In order to visualize 3D calcium vesicle dynamics in live sea urchin embryos for long periods of  
176 time, we used the LLSM at the advanced imaging center at the Janelia research campus[43]. This  
177 LLSM setup allows for high temporal resolution of ~40ms per slice and about ~2 sec for 3D  
178 embryonic volume of ~40 $\mu$ m[43, 50]. We used green calcein to stain the calcium ions[14] and  
179 FM4-64 to mark cell membranes in live sea urchin embryos of the species, *Lytechinus variegatus*

180 (*L. variegatus*) at different stages of skeletogenesis (Fig. 1A-C)[17]. Calcein is membrane-  
181 impermeable and therefore can only enter the cells through endocytosis[11]. To study the effect  
182 of VEGF signaling we treated sea urchin embryos with the VEGFR inhibitor, axitinib (Fig. 1D-  
183 F). Axitinib is a specific inhibitor of human VEGFR2 that binds to the kinase domain that is  
184 highly conserved between human and sea urchin; specifically, the six amino-acids to which  
185 Axitinib binds are conserved between human and sea urchin VEGFR[17]. Axitinib treatment  
186 results in similar skeletogenic phenotypes to those observed in genetic perturbations of the VEGF  
187 gene in *L. variegatus*[39] and particularly, it results in complete skeletal loss (Fig. 1D-F)[17, 39].  
188 Axitinib is dissolved in DMSO and our control embryos were therefore cultured in a similar  
189 concentration of DMSO like the axitinib embryos, see Methods for experimental details. Details  
190 of all the time-lapses we used in this work are provided in Dataset S1.

191 Before we further describe our experiments and observations, some methodological limitations  
192 must be mentioned. The embryos were grown in calcein until early gastrula stage and then calcein  
193 was washed about two hours or more before we could image vesicle dynamics. This time interval  
194 after the wash was necessary to eliminate the calcein stain from the cell cytoplasm and  
195 blastocoelar fluid so the individual calcein stained-vesicles would be distinct from the  
196 background. However, as the blastocoelar fluid was not stained with calcein during the imaging,  
197 we were unable to detect live-pinocytosis as well as unstained calcium vesicles that were  
198 apparently deposited into the spicules (Fig. 1C). To immobilize the embryos and enable live-  
199 imaging for long period of time (>30min), we immersed the embryos in low melting agarose and  
200 in this condition the spicule elongation is significantly slower than in free swimming embryos. In  
201 other systems, substrate stiffness was shown to regulate cellular behaviors[51][52], and we need  
202 to consider this effect in our interpretation of the data.

#### 203 **4D rendering of the LLSM data reveals rich cellular behaviors and vesicular** 204 **dynamics**

205 To visualize the 3D structure and motion of the cells and the vesicles in the embryos throughout  
206 time, we reconstructed a 3D model from the individual slices and then connected these images  
207 over time to produce time-lapse sequences. The datasets are made up of two-channels (calcein  
208 and FM4-64) of between 80 to 120 image-slices per time point (frame). Each frame is  
209 reconstructed into a 3D volume that spans approximately 40 $\mu$ m of the sea urchin embryo. We  
210 present here six representative movies, three of control and three of VEGFR inhibition, that  
211 include 200-400 frames separated by time intervals of 3.26-6.12 sec, spanning about 20-30  
212 minutes of cellular and vesicular motion (Fig. 1 and Movies S1-6).



213 The rendered movies demonstrate the highly dynamic cellular and vesicular motion in the two  
214 experimental conditions. At the developmental stages in which we recorded the movies the  
215 skeletogenic cells are in close contact with the ectodermal layer[53]. In normal embryos they are  
216 in close vicinity to the developing spicule (Fig. 1B,C, 2A) and in both conditions they form  
217 clusters and rapidly extend filopodia that contact and fuse between cells[39] (Figs. 1 and 2). We  
218 also detect some non-skeletogenic mesenchymal cells that move around individually and are not  
219 in direct contact with the ectoderm (Fig. 1A, Sup movie 3). The formation of skeletogenic cell  
220 clusters that are bound to the ectoderm in both control and VEGFR inhibition suggests that  
221 VEGF-independent ectodermal cues are responsible for the observed skeletogenic adhesion[53].

### 222 **Vesicle volume is larger in the skeletogenic cells vs. the ectodermal cells and** 223 **increases under VEGFR inhibition**

224 Next, we wanted to study the effect of VEGFR inhibition on the volume of calcium vesicles  
225 within the embryonic cells. To automatically quantify vesicle volume, we identified each vesicle  
226 in all frames using the segmentation algorithm discussed in the methods section (Fig. 3A, B).  
227 After automated identification of each vesicle, the size of each vesicle can be measured based on  
228 the volume of the pixels identified. To differentiate between the skeletogenic cells and the other  
229 embryonic territories we manually identified the boundaries of the ectoderm and of the endoderm  
230 regions in the first frame of each movie and used this frame for volume statistics (Fig. 3C). As the  
231 endoderm region was apparent only in few of the movies, we focused on characterizing the sizes  
232 of vesicles in the ectoderm and the skeletogenic cells. In some of the movies the mesodermal  
233 region contains a few non-skeletogenic mesodermal cells, but since the movies were focused on  
234 clusters of skeletogenic cells, the contribution of the non-skeletogenic cells to our analyses is  
235 minor.

236 Our measurements show that in control embryos, the average volume of calcein stained vesicles  
237 in the skeletogenic cells is  $\sim 0.4\mu\text{m}^3$  while in the ectodermal cells it is significantly smaller,  
238  $\sim 0.25\mu\text{m}^3$  (Fig. 3D, Dataset S1). Under VEGFR inhibition, the average volume of calcein stained  
239 vesicles is higher compared to normal embryos both in the skeletogenic cells and in the  
240 ectodermal cells (Fig. 3D, Dataset S1). The average volume of the calcein stained vesicles under  
241 VEGFR inhibition is  $\sim 0.46\mu\text{m}^3$  in the skeletogenic cells and  $\sim 0.34\mu\text{m}^3$  in the ectodermal cells, an  
242 increase of more than 12% in vesicle volume in both tissues. We previously observed an increase  
243 in the number of vesicles in the skeletogenic cells under VEGFR inhibition at the time when the  
244 spicule forms in normal embryos[17]. The increase in vesicle number and volume might result  
245 from the higher level of calcium present in the blastocoel when VEGF signaling is inactive, since

246 calcium is not sequestered into the spicules and accumulates in the blastocoel and its level is  
247 increased in all the cells of the embryo.

248 **Vesicle speed is slower in the skeletogenic cells compared to the ectodermal cells and**  
249 **the directionality is similar in the two tissues.**

250 We wanted to quantify vesicle dynamics in the cells of the sea urchin embryo and study the effect  
251 of VEGFR inhibition on vesicle motion. To do that we applied the tracking algorithm we  
252 developed previously[49, 54] (see the methods section for details). Tracking maintains the  
253 identity of each vesicle over time, allowing instantaneous speed and velocity measurements,  
254 frame to frame, for each individual vesicle. Throughout this manuscript we use the term “**speed**”  
255 to describe the size of the velocity and the term “**velocity**” to describe the vector-velocity that  
256 includes the information of both the size and direction. An example **instantaneous speed**  
257 measurement is shown in Figure 4A, the magenta line represents the motion of the vesicle from  
258 the previous frame. The vesicle instantaneous speed is the length of the line (distance traveled in  
259 a single frame) divided by the time between frames (here, ~6 seconds). An important constraint  
260 on the effectiveness of tracking algorithms is the temporal resolution of the imaging relative to  
261 the speed of tracked objects. In the case of the calcium vesicles, we discovered that too much  
262 motion occurred between frames for effective tracking if the temporal resolution was 15 seconds  
263 or more per frame. We therefore only applied the tracking algorithm and motion analyses to  
264 movies with temporal resolution less than 15 seconds per frame, that is, 3.26-6.12 seconds per  
265 frame (see Dataset S1 for the details of movies that were included in this analysis).

266 The average instantaneous speed per track of the vesicles in the skeletogenic cells is about  
267  $0.09\mu\text{m}/\text{sec}$  in control embryos and is reduced to  $\sim 0.08\mu\text{m}/\text{sec}$  in VEGFR inhibition (Fig. 4C,  
268 Dataset S1 and methods). A larger difference is observed between the vesicle speed in the  
269 skeletogenic cells and in the ectoderm, where the average instantaneous speed per track is  
270  $0.07\mu\text{m}/\text{sec}$  in control embryos and reduces to  $\sim 0.05\mu\text{m}/\text{sec}$  under VEGFR inhibition. Thus,  
271 vesicle volume and speed are larger in the skeletogenic cells compared to the ectodermal cells in  
272 both control and VEGFR inhibition (Fig. 3D, 4C, Dataset S1).

273 Interestingly, the instantaneous speed decreases with VEGFR inhibition while the volume  
274 increases in this condition for both the skeletogenic cells and the ectoderm. Despite these clear  
275 trends, there is no correlation between vesicle volume and speed throughout the experimental  
276 conditions (Fig. S1A, B). The lack of correlation implies that the change of vesicle volume is not  
277 related to the change in vesicle motion and is due to different regulation of these quantities in the  
278 embryonic cells.

279 To further characterize vesicle motion, we quantified the directionality of vesicle velocity by  
280 measuring the **directionality index**. The directionality index is the ratio between the maximal  
281 displacement and the total length of the vesicle track during a time window of one minute (Fig.  
282 4B)[55, 56]. Values close to 1, reflect linear (directed) motion and values close to 0, reflect  
283 random motion. The average directionality index in both the skeletogenic and ectodermal cells is  
284 about 0.42 and it shows minor changes under VEGFR inhibition (Fig. 4D, Dataset S1). This value  
285 is similar to the directionality index measured for endocytic vesicles that guided by molecular  
286 motors along microtubules in astrocyte cultures[55, 56]. However, the typical speed of motor-  
287 guided vesicles in these cultures and in other systems is much faster ( $\sim 0.4\text{-}0.5\mu\text{m}/\text{sec}$ )[55-57]  
288 compared to our measurements ( $\sim 0.05\text{-}0.09\mu\text{m}/\text{sec}$ ). Additionally, the motor-guided movement of  
289 vesicles along microtubules was shown to be in bursts of directed motion that last  $\sim 6\text{-}7$  seconds  
290 followed by a pause for a similar time interval[36, 57]. If that was the case for the calcium  
291 vesicles we would have expected to see two peaks of instantaneous speed, a fast-speed peak  
292 corresponding to the directed motion and a slow-speed peak corresponding to the pause.  
293 However, the distribution of measured instantaneous speed shows only a single peak that  
294 corresponds to the relatively slow movement of the vesicles reported above (Fig. S2). The slow  
295 instantaneous speed and the lack of two modes of motion suggest that the vesicle motion is not  
296 guided by molecular motors along the microtubule network.

### 297 **The calcium vesicles perform an active diffusion motion in the skeletogenic cells and** 298 **the ectoderm**

299 In other systems, vesicles were shown to experience a diffusive motion that is not thermal in  
300 nature but results from the dynamic remodeling of the cytoskeletal network and the ubiquitous  
301 activity of motor proteins that affect every moving object within the cell cytoplasm[36, 37]. This  
302 mode of diffusion is called “active diffusion” and is characterized by a larger amplitude (step  
303 size) compared to the amplitude of thermally-induced diffusion. Additionally, the diffusion  
304 coefficient for active diffusion is independent of particle size, unlike thermal diffusion where the  
305 diffusion coefficient decreases with increasing particle size[37]. To test whether the calcium  
306 vesicles experience an active diffusion motion we fit a standard diffusion motion model to each  
307 track. We plot the mean-square displacement,  $\langle \Delta x^2 \rangle$ , as a function of time,  $\Delta t$ , and use a linear fit  
308 to measure the **diffusion coefficient**[34],  $D$ ,  $\langle \Delta x^2 \rangle = D\Delta t$ , for each track (Fig. 4E). Mean-square  
309 displacement is measured by taking the squared sum of path-lengths (e.g. the lengths of magenta  
310 line segments in Fig. 4B) for each vesicle track. Most of the data fit well within this model, that  
311 is,  $R^2 \geq 0.8$  for 90% of the tracked vesicles (Fig. 4F). The average diffusion coefficient is

312  $D \sim 0.01 \mu\text{m}^2/\text{sec}$  in the skeletogenic cells and is not affected by VEGFR inhibition (Fig. 4E,  
313 Dataset S1). In the ectoderm the diffusion coefficient is smaller,  $D \sim 0.008 \mu\text{m}^2/\text{sec}$  and it  
314 decreases to  $0.005 \mu\text{m}^2/\text{sec}$  under VEGFR inhibition. This is in agreement with the lower  
315 instantaneous speed measured for the ectodermal vesicles compared to the skeletogenic cells (Fig.  
316 4C). The diffusion coefficient does not correlate with vesicle size (Fig. S1C, D), which supports  
317 active diffusion. Thus, our analyses reveal an active diffusion mode of the calcium vesicle motion  
318 in both the skeletogenic and ectodermal cells, with higher diffusion coefficient in the skeletogenic  
319 cells.

### 320 **Vesicle motion is not directed toward the spicule but the vesicle speed slows down** 321 **close to the spicule**

322 Lastly, we wanted to investigate vesicle deposition in normal embryos and study vesicle motion  
323 near the spicule in this condition. Vesicle-membrane fusion is a very fast process that occurs  
324 within  $\sim 100$  milliseconds[58], and therefore our temporal resolution did not allow us to detect  
325 such events. However, vesicle content deposition can last several minutes, as was shown for the  
326 vesicles that carry adhesive glycoproteins that are secreted into the lumen of the drosophila  
327 salivary gland[59, 60]. To see if we could detect such processes, we studied the directionality and  
328 speed of vesicle motion relative to the spicule and tried to infer whether the vesicles are trafficked  
329 toward the spicule and if they slow down near the spicule vicinity.

330 To measure vesicle motion relative to the spicule we manually marked the spicule and measured  
331 vesicle velocity toward the spicule at increasing distances from the spicule (Fig. 5A, B). The  
332 average velocity is around zero indicating random motion toward and away from the spicule,  
333 which suggests that vesicle motion is not directed towards the spicule; in other words, the spicule  
334 does not attract vesicle movement towards it. However, the average vesicle speed is significantly  
335 lower near the spicules (Fig. 5C). The vesicle speed is  $\sim 0.05 \mu\text{m}/\text{sec}$  at distances of  $1-2 \mu\text{m}$  from  
336 the spicule, while at distances  $\geq 8 \mu\text{m}$  it increases to  $\sim 0.09 \mu\text{m}/\text{sec}$ , which is the average  
337 instantaneous speed in the skeletogenic cells (Fig. 5C). Overall, vesicle velocity is not directed  
338 toward the spicules but the vesicles significantly slow down near the spicule, possibly, as they  
339 bind to it and deposit their content.

## 340 **Discussion**

341 A key requirement of biomineralizing organisms is the ability to accumulate minerals inside  
342 intracellular vesicles where the mineral is kept in an amorphous state until it is deposited into the  
343 biomineralization compartment[11, 13, 15]. Despite the key role of mineral bearing vesicles in

344 the biological regulation of biomineralization, very little is known about their trafficking inside  
345 the biomineralizing cells and the regulation of their dynamics and deposition. Here we studied the  
346 cellular dynamics and the motion of calcium vesicles in the cells of normal sea urchin embryos  
347 and in embryos grown under VEGFR inhibition, where skeletogenesis is blocked. Our studies  
348 reveal differences in vesicle volume and speed between the epithelial ectodermal cells and the  
349 mesenchymal skeletogenic cells that generate the skeleton. In both tissues the vesicles seem to  
350 perform an active diffusion motion, with higher diffusion coefficients in the skeletogenic cells.  
351 The motion of the vesicles is not directed toward the spicule but they seem to slow down near it,  
352 as they possibly bind and deposit the mineral. Below we discuss the possible molecular  
353 mechanisms that underlie these observations and the implications of our studies on the  
354 understanding the biological regulation of biomineralization and reproducing it in artificial  
355 systems.

356 Our measurements show that in both control and VEGFR inhibited embryos, the average volume  
357 of calcein stained vesicles is larger in the skeletogenic cells compared to the ectodermal cells  
358 (Fig. 3D, Dataset S1). This difference might result from different processing of the vesicle  
359 content in these two cell populations. Indeed, previous studies where calcein was added to the sea  
360 water together with another membrane impermeable dye, alexa-dextran, showed different  
361 behaviors of the dyes in the skeletogenic vs. ectodermal cells: while most of the ectoderm  
362 vesicles were stained evenly with the two dyes, about a third of the skeletogenic vesicles were  
363 stained only in calcein and lack alexa-dextran<sup>11</sup>. This indicates that calcium vesicles in the  
364 skeletogenic cells are biologically processed to eliminate the sea water and increase the calcium  
365 concentration, while in the ectoderm this processing does not occur. Together, these findings  
366 indicate that the biological regulation of calcium vesicle content is distinct between the  
367 skeletogenic and the ectodermal cells which apparently leads to higher calcium vesicle volume in  
368 the skeletogenic biomineralizing cells. There is a multitude of evidence of a specific activation of  
369 genes that regulate  $\text{CO}_3^{2-}$  homeostasis in the skeletogenic cells, *e.g.*, the carbonic anhydrase like-7,  
370 Caral7[17, 41], and the bicarbonate transporter, SCL4a10[61]. However, further studies are  
371 required to identify the genes responsible for the specific regulation of  $\text{Ca}^{+2}$  ions in the vesicles of  
372 the skeletogenic cells.

373 VEGFR inhibition increases calcium vesicle volume in both the skeletogenic and ectodermal cells  
374 (Fig. 3D). Apparently, when the skeleton doesn't form and the calcium is not sequestered into the  
375 spicule, calcium is accumulated in the sea urchin blastocoel and is taken by the cells through  
376 macropinocytosis. As VEGFR is only expressed in the skeletogenic cells, the increase of calcium

377 vesicle volume in both tissues supports VEGF-independent macropinocytosis as a major source  
378 of calcium accumulation in all the cells of the embryo.

379 The slow speed of the vesicles compared to motor-guided motion on microtubules and the good  
380 agreement of the diffusion model support an active diffusion motion in all the cells of the embryo  
381 (Fig. 4). In active diffusion motion the vesicle diffusion length depends on the mechanical  
382 properties and dynamics of the cytoskeleton network in the cells so every object in the cell is  
383 expected to move in a similar manner, regardless of its size[34, 37]. Hence, the lower speed and  
384 diffusion coefficient of the vesicles in the ectoderm could be due to the epithelial nature of these  
385 cells that makes them stiffer compared to the mesenchymal skeletogenic cells[51]. The lack of  
386 correlation between the diffusion coefficient and vesicle size (Fig. S1C,D) and the similarity of  
387 the values we measured to the diffusion coefficients measured in mice synapses where the vesicle  
388 size is much smaller (~50-100nm)[62], further support the active diffusion motion modality.  
389 Under VEGFR inhibition, the vesicle speed is slightly reduced but the vesicles continue in their  
390 diffusive motion, indicating that the motion of the vesicles in the cells is VEGF-independent.  
391 Overall, our studies suggest that calcium vesicles undergo active diffusion motion that reflects the  
392 mechanical properties of cells and therefore varies between the mesenchymal skeletogenic cells  
393 and the epithelial ectodermal cells of the sea urchin embryo.

394 The interaction of the embryos with the surrounding agarose could have potentially affected  
395 the mechanical properties of the cells, as environmental stiffness was shown to affect cell  
396 stiffness and mechanical properties in other systems[51]. The agarose stiffness is about 35-  
397 50kPa[63] which is much more rigid than the sea water where the sea urchins naturally grow. The  
398 agarose stiffness could increase the stiffness of the ectodermal cells and of the skeletogenic cells  
399 that attach to them and affect their mechanical properties. This effect and possibly the lack of  
400 movement, could underlie the slow growth of the spicule under these conditions. Relatedly,  
401 vertebrates' endothelial cell-specification and vascular tubulogenesis were shown to depend on  
402 the mechanical properties of the substrate *in-vitro*[52, 64, 65]. Specifically, growth on soft  
403 substrates promoted VEGF-induced vascular tubulogenesis whereas growth on more rigid  
404 substrates inhibited this process[52]. It would be interesting to study the effect of environmental  
405 stiffness on the mechanical properties of the sea urchin embryonic cells and see whether the  
406 inhibition of tubulogenesis in hard substrates is common to vertebrate vascularization and sea  
407 urchin skeletogenesis.

408 Our analysis of vesicle movement near the spicules showed that the vesicle motion is not directed  
409 towards the spicule but they slow down at distances of 1-2 $\mu$ m from the spicule, as they possibly

410 bind to it (Fig. 5). In the *Drosophila* salivary gland a regulatory network of cytoskeleton proteins  
411 assembles around the vesicles once they bind to the apical membrane and controls the secretion  
412 of the vesicle content[59, 60]. This network includes the small GTPase, Rho1, that activates the  
413 Rho kinase, ROK, that activates myosin II contractions. Additionally, Rho1 recruits a RhoGap  
414 protein that inactivates Rho1 which leads to the disassembly of the F-actin around the  
415 vesicles[60]. Relatedly, inhibition of the sea urchin homolog of ROK completely blocks  
416 skeletogenesis, inhibition of the small GTPase CDC42 prevents the formation of the spicule  
417 chord and biomineralization, and knockdown of the RhoGap gene, rhogap24l/2 perturbs normal  
418 spicule formation[17, 66, 67]. Based on these works and on our observation, we offer the  
419 following hypothesis for mineral deposition: The calcium vesicles attach to the inner membrane  
420 of the spicule chord, and secrete their content by regulated acto-myosin contractions around the  
421 vesicle. To verify our hypothesis, the role of these and other cytoskeleton remodeling proteins in  
422 vesicle deposition in the sea urchin need to be investigated.

423 The absence of directed vesicle motion is quite promising for the design of artificial systems that  
424 try to mimic the ability of biomineralizing cells to control mineral properties and growth[5, 68].  
425 In these systems, synthetic vesicles with controlled lipid, protein and mineral content are  
426 fabricated, the proteoliposomes. The proteoliposomes are investigated in search for novel  
427 therapeutic approaches for promoting calcification on one hand, and preventing ectopic  
428 calcification on the other hand[5, 6, 68]. If mineral bearing vesicles are not actively transported to  
429 the biomineralization site, but just diffuse, there is one less molecular mechanism to worry about  
430 when constructing artificial vesicle based biomimetic systems. Thus, our studies provide a  
431 promising starting point for deciphering the molecular control of calcium vesicle dynamics with  
432 implications for both basic and translational research.

## 433 **Methods**

### 434 **Adult animals and embryo cultures**

435 Adult *L. variegatus* were obtained from the Duke University Marine Laboratory (Beaufort, NC,  
436 USA). Spawning was induced by intracoelomic injection of 0.5M KCl. Embryos were cultured in  
437 artificial sea water at 23°C.

### 438 **Calcein staining**

439 A 2mg/ml stock solution of green calcein (C0875, Sigma, Japan) was prepared by dissolving the  
440 chemical in distilled water. Working solution of 25µg/ml was prepared by diluting the stock

441 solution in artificial sea water. Embryos were grown in calcein artificial sea water from  
442 fertilization and washed from calcein about 2-3 hours prior to the experiments.

#### 443 **FM4-64 staining**

444 A 100 $\mu$ g/ml stock solution of FM4-64 (T13320, Life technologies, OR, USA) was prepared by  
445 dissolving the chemical in distilled water. Working solution of 5 $\mu$ g/ml was prepared by diluting  
446 the stock solution in artificial sea water. Calcein stained embryos were immersed in working  
447 solution about 10 minutes before visualization.

#### 448 **Axitinib (AG013736) treatment**

449 A 5mM stock solution of the VEGFR inhibitor, axitinib (AG013736, Selleckchem, Houston, TX,  
450 USA), was prepared by reconstituting this chemical in dimethylsulfoxyde (DMSO). Treatments  
451 were carried out by diluting aliquots of the axitinib stock in embryo cultures to provide a final  
452 concentration of 150 nM. Control embryos in all experiments were cultured in equivalent  
453 concentrations of DMSO at no more than 0.1% (v/v).

#### 454 **Sample preparation for Lattice Light Sheet Microscopy**

455 2% low melting agarose (Sigma cat# A0701) melted in artificial sea water at 37°C was added to  
456 the stained embryos at the ratio of 5:1, to immobilize the embryos. The sample was then  
457 immersed in the microscope tab with 8 mL artificial sea water with 20 $\mu$ L FM4-64 working  
458 solution.

#### 459 **Lattice Light Sheet Microscopy**

460 The lattice light sheet microscope (LLSM) used in these experiments is housed in the Advanced  
461 Imaged Center (AIC) at the Howard Hughes Medical Institute Janelia research campus. The  
462 system is configured and operated as previously described[43]. Samples are illuminated by a 2D  
463 optical lattice generated by a spatial light modulator (SLM, Fourth Dimension Displays). The  
464 sample is excited by 488 nm, diode lasers (MPB Communications) through an excitation  
465 objective (Special Optics, 0.65 NA, 3.74-mm WD). Fluorescent emission is collected by  
466 detection objective (Nikon, CFI Apo LWD 25XW, 1.1 NA), and detected by a sCMOS camera  
467 (Hamamatsu Orca Flash 4.0 v2). Acquired data are deskewed as previously described[43] and  
468 deconvolved using an iterative Richardson-Lucy algorithm with a point-spread function  
469 empirically determined for the lattice-light sheet optical system.

#### 470 **Tracking of Calcium Vesicles**



471 The automatic detection of vesicles in each frame (segmentation) is accomplished using the high-  
472 performance Hydra Image Processing library for fast 3-D image filtering[69]. We use a blob-  
473 detection approach similar to Chenourd et al. based on the Laplacian of Gaussians (LOG)  
474 filter[47]. The LOG filter can be used for blob-like object detection. In this work we used a  
475 thresholded 3D LOG to identify the vesicles in each frame. This method identifies the size and  
476 position of each vesicle, some example vesicle detections are shown in figure 3B, based on the  
477 image data in Fig. 3A. **Source code for all segmentation, tracking and statistical analyses can**  
478 **be found in the referenced GitLab repository[70].**

479 In order to keep track of each vesicle over time, we integrated our segmentation approach into the  
480 LEVER software package[48, 49]. LEVER uses a multitemporal cost function based on a small  
481 motion model to link the most likely vesicle detections into tracks (Fig. 4B). We used these  
482 vesicle tracks to analyze vesicle dynamics such as changes in velocity or size over time. The  
483 performance of the tracking algorithm degrades with significant motion, beyond the capabilities  
484 of the software to predict[48, 54]. In these datasets it is difficult to determine the frame-to-frame  
485 vesicle identities even by eye (see *e.g.* movie S7). For this reason, we have restricted our  
486 tracking-based analyses to datasets with a time-lapse of 6.12 seconds or less, per frame.

#### 487 **Single-Frame Manual Identification of Ectodermal Region**

488 In order to examine the dynamics of calcium specifically in the skeletogenic cells, we must  
489 separate out the ectoderm cells which form the exterior layer of the sea urchin embryo. However,  
490 in these images, the cells of the ectodermal region are often similar in their general shape to the  
491 skeletogenic cells and are quite close together. For this task we manually defined the ectodermal  
492 boundary in the first frame of each dataset. An example of such a boundary is shown in figure 3C.

493 We also applied a registration algorithm using normalized covariance to automatically detect  
494 motion of the ectoderm region over time. For all movies analyzed, the motion of the ectoderm  
495 region was minimal for the first 50 frames. We therefore limited the analysis of our datasets to the  
496 first 50 frames, allowing the use of the ectoderm mask for identifying vesicles throughout the  
497 analysis.

#### 498 **Vesicle Speed, Directionality, and Motion**

499 We measure the frame-to-frame speed of each vesicle by measuring the distance moved between  
500 frames divided by the frame rate. This instantaneous speed is averaged over each vesicle track to  
501 produce an **average instantaneous speed** per vesicle. Short vesicle tracks (less than 7 frames) are  
502 ignored as they are likely to be made up of noisy or unreliable detections.

503 We also measure the **directionality index** for each vesicle (Fig. 4B). This is the ratio of the  
504 maximal displacement of the vesicle divided by the total path length traveled by the vesicle in a  
505 window of 60 seconds. For example, in figure 4B, the directionality index ratio would be the  
506 length of the white dotted segment (maximal displacement) divided by the total length of the  
507 magenta segments. The index is related to the directedness of motion observed for each vesicle, a  
508 vesicle traveling in a straight line will have a directionality index of 1, whereas an undirected  
509 vesicle will have a low directionality index.

510 In order to identify the types of motions exhibited by the calcium vesicles, we fit a standard  
511 diffusion motion model to each track. For the diffusion model, we measure the **diffusion**  
512 **coefficient** as the slope of the linear relationship between vesicle mean-square displacement  
513 (MSD) and time. All motion and size comparisons were based on the vesicle segmentation and  
514 tracking information from the LEVER software, they were computed using MATLAB version  
515 2019b analysis software.

516

### 517 **Spicule-Relative Measurements**

518 Understanding the dynamics of calcium vesicles in biomineralization requires identifying the  
519 motion of vesicles relative to the skeletal structure (spicule) in DMSO image sequences. For a  
520 selection of movies with a visually defined spicule, we manually identify the spicule centerline in  
521 a single frame. An example centerline is shown along with the 3-D spicule image in figure 5A.  
522 All vesicle distances are measured relative to the spicule centerline in each frame. Vesicles are  
523 binned in 1 $\mu$ m increments by their average distance from the spicule for comparison of average  
524 speed at different distances from the spicule. Average distance change per second is also  
525 measured for each vesicle, this is referred to as the average velocity toward the spicule.

### 526 **Statistical Analysis**

527 For the analysis of differences in average vesicle size and motion characteristics, we first apply  
528 the Kruskal-Wallis one-way rank test to identify if there are significant differences across all  
529 experimental groups and regions. If a significant difference is observed, then post-hoc pairwise  
530 analysis (Dunn-Sidak) is carried out between groups to identify differences between each pair of  
531 interest. The MATLAB version 2019b software package was used to perform the analysis. The p-  
532 values of each comparison are presented in Dataset S1.

533

## 534 **References**

- 535 1. Lowenstam HA, Weiner S. On Biomineralization. New York: Oxford University Press;  
536 1989.
- 537 2. Lerch MM, Grinthal A, Aizenberg J. Viewpoint: Homeostasis as Inspiration-Toward  
538 Interactive Materials. *Adv Mater.* 2020:e1905554. Epub 2020/01/11. doi:  
539 10.1002/adma.201905554. PubMed PMID: 31922621.
- 540 3. Wu F, Chen S, Chen B, Wang M, Min L, Alvarenga J, et al. Bioinspired Universal Flexible  
541 Elastomer-Based Microchannels. *Small.* 2018;14(18):e1702170. Epub 2018/01/13. doi:  
542 10.1002/smll.201702170. PubMed PMID: 29325208.
- 543 4. Kumar K, Liu J, Christianson C, Ali M, Tolley MT, Aizenberg J, et al. A Biologically Inspired,  
544 Functionally Graded End Effector for Soft Robotics Applications. *Soft Robot.* 2017;4(4):317-23.  
545 Epub 2017/12/19. doi: 10.1089/soro.2017.0002. PubMed PMID: 29251563.
- 546 5. Simao AM, Yadav MC, Ciancaglini P, Millan JL. Proteoliposomes as matrix vesicles'  
547 biomimetics to study the initiation of skeletal mineralization. *Braz J Med Biol Res.*  
548 2010;43(3):234-41. Epub 2010/04/20. doi: 10.1590/s0100-879x2010007500008. PubMed PMID:  
549 20401430; PubMed Central PMCID: PMC5298493.
- 550 6. Bolean M, Izzi B, van Kerckhoven S, Bottini M, Ramos AP, Millan JL, et al. Matrix vesicle  
551 biomimetics harboring Annexin A5 and alkaline phosphatase bind to the native collagen matrix  
552 produced by mineralizing vascular smooth muscle cells. *Biochim Biophys Acta Gen Subj.*  
553 2020;1864(8):129629. Epub 2020/05/04. doi: 10.1016/j.bbagen.2020.129629. PubMed PMID:  
554 32360152.
- 555 7. Chen Y, Feng Y, Deveaux JG, Masoud MA, Chandra FS, Chen H, et al. Biomineralization  
556 Forming Process and Bio-inspired Nanomaterials for Biomedical Application: A Review. *Minerals.*  
557 2019;9(68):1-21.
- 558 8. Murdock DJ, Donoghue PC. Evolutionary origins of animal skeletal biomineralization.  
559 *Cells Tissues Organs.* 2011;194(2-4):98-102. Epub 2011/06/01. doi: 10.1159/000324245.  
560 PubMed PMID: 21625061.
- 561 9. Knoll AH. Biomineralization and Evolutionary History. *Reviews in Mineralogy and*  
562 *Geochemistry.* 2003;54:329-56. doi: doi:10.2113/0540329.
- 563 10. De Yoreo JJ, Gilbert PU, Sommerdijk NA, Penn RL, Whitlam S, Joester D, et al. CRYSTAL  
564 GROWTH. Crystallization by particle attachment in synthetic, biogenic, and geologic  
565 environments. *Science.* 2015;349(6247):aaa6760. doi: 10.1126/science.aaa6760. PubMed PMID:  
566 26228157.
- 567 11. Vidavsky N, Addadi S, Schertel A, Ben-Ezra D, Shpigel M, Addadi L, et al. Calcium  
568 transport into the cells of the sea urchin larva in relation to spicule formation. *Proc Natl Acad Sci*  
569 *U S A.* 2016. doi: 10.1073/pnas.1612017113. PubMed PMID: 27791140; PubMed Central PMCID:  
570 PMC5111655.
- 571 12. Bentov S, Brownlee C, Erez J. The role of seawater endocytosis in the biomineralization  
572 process in calcareous foraminifera. *Proc Natl Acad Sci U S A.* 2009;106(51):21500-4. Epub  
573 2009/12/17. doi: 10.1073/pnas.0906636106. PubMed PMID: 20007770; PubMed Central  
574 PMCID: PMC2799886.
- 575 13. Weiner S, Addadi I. Crystallization Pathways in Biomineralization. *Annu Rev Mater Res.*  
576 2011;41:21-40.
- 577 14. Vidavsky N, Addadi S, Mahamid J, Shimoni E, Ben-Ezra D, Shpigel M, et al. Initial stages  
578 of calcium uptake and mineral deposition in sea urchin embryos. *Proc Natl Acad Sci U S A.*  
579 2014;111(1):39-44. Epub 2013/12/18. doi: 10.1073/pnas.1312833110. PubMed PMID:  
580 24344263; PubMed Central PMCID: PMC3890786.

- 581 15. Vidavsky N, Masic A, Schertel A, Weiner S, Addadi L. Mineral-bearing vesicle transport in  
582 sea urchin embryos. *J Struct Biol.* 2015;192(3):358-65. doi: 10.1016/j.jsb.2015.09.017. PubMed  
583 PMID: 26431896.
- 584 16. Politi Y, Metzler RA, Abrecht M, Gilbert B, Wilt FH, Sagi I, et al. Transformation  
585 mechanism of amorphous calcium carbonate into calcite in the sea urchin larval spicule. *Proc*  
586 *Natl Acad Sci U S A.* 2008;105(45):17362-6. Epub 2008/11/07. doi: 10.1073/pnas.0806604105.  
587 PubMed PMID: 18987314; PubMed Central PMCID: PMC2582271.
- 588 17. Morgulis M, Gildor T, Roopin M, Sher N, Malik A, Lalzar M, et al. Possible cooption of a  
589 VEGF-driven tubulogenesis program for biomineralization in echinoderms. *Proc Natl Acad Sci U S*  
590 *A.* 2019. doi: 10.1073/pnas.1902126116. PubMed PMID: 31152134.
- 591 18. Oliveri P, Tu Q, Davidson EH. Global regulatory logic for specification of an embryonic  
592 cell lineage. *Proc Natl Acad Sci U S A.* 2008;105(16):5955-62. Epub 2008/04/17. doi:  
593 10.1073/pnas.0711220105. PubMed PMID: 18413610; PubMed Central PMCID: PMC2329687.
- 594 19. Gibbins JR, Tilney LG, Porter KR. Microtubules in the formation and development of the  
595 primary mesenchyme in *Arbacia punctulata*. I. The distribution of microtubules. *J Cell Biol.*  
596 1969;41(1):201-26. PubMed PMID: 5775786; PubMed Central PMCID: PMCPMC2107725.
- 597 20. Beniash E, Addadi L, Weiner S. Cellular control over spicule formation in sea urchin  
598 embryos: A structural approach. *J Struct Biol.* 1999;125(1):50-62. Epub 1999/04/10. doi:  
599 10.1006/jsbi.1998.4081. PubMed PMID: 10196116.
- 600 21. Gong YU, Killian CE, Olson IC, Appathurai NP, Amasino AL, Martin MC, et al. Phase  
601 transitions in biogenic amorphous calcium carbonate. *Proc Natl Acad Sci U S A.*  
602 2012;109(16):6088-93. Epub 2012/04/12. doi: 10.1073/pnas.1118085109. PubMed PMID:  
603 22492931; PubMed Central PMCID: PMC3341025.
- 604 22. De-Leon SBT, Davidson EH. Gene regulation: Gene control network in development.  
605 *Annual Review of Biophysics and Biomolecular Structure.* 2007;36:191-212. doi:  
606 10.1146/annurev.biophys.35.040405.102002. PubMed PMID: WOS:000247773000010.
- 607 23. Wilt FH, Killian CE, Hamilton P, Croker L. The dynamics of secretion during sea urchin  
608 embryonic skeleton formation. *Exp Cell Res.* 2008;314(8):1744-52. doi:  
609 10.1016/j.yexcr.2008.01.036. PubMed PMID: 18355808; PubMed Central PMCID:  
610 PMCPMC2444014.
- 611 24. Killian CE, Wilt FH. Endocytosis in primary mesenchyme cells during sea urchin larval  
612 skeletogenesis. *Exp Cell Res.* 2017;359(1):205-14. doi: 10.1016/j.yexcr.2017.07.028. PubMed  
613 PMID: 28782554.
- 614 25. Ingersoll EP, Wilt FH. Matrix metalloproteinase inhibitors disrupt spicule formation by  
615 primary mesenchyme cells in the sea urchin embryo. *Dev Biol.* 1998;196(1):95-106. doi:  
616 10.1006/dbio.1998.8857. PubMed PMID: 9527883.
- 617 26. McMahon HT, Boucrot E. Molecular mechanism and physiological functions of clathrin-  
618 mediated endocytosis. *Nat Rev Mol Cell Biol.* 2011;12(8):517-33. Epub 2011/07/23. doi:  
619 10.1038/nrm3151. PubMed PMID: 21779028.
- 620 27. Pollard TD, Lippincott-Schwartz J, Earnshaw WC, Johnson GT. *Cell Biology.* 3rd ed:  
621 Elsevier Inc.; 2017.
- 622 28. Parton RG, Simons K. The multiple faces of caveolae. *Nat Rev Mol Cell Biol.*  
623 2007;8(3):185-94. Epub 2007/02/24. doi: 10.1038/nrm2122. PubMed PMID: 17318224.
- 624 29. Lim JP, Gleeson PA. Macropinocytosis: an endocytic pathway for internalising large  
625 gulps. *Immunol Cell Biol.* 2011;89(8):836-43. Epub 2011/03/23. doi: 10.1038/icb.2011.20.  
626 PubMed PMID: 21423264.

- 627 30. Kasahara K, Nakayama Y, Sato I, Ikeda K, Hoshino M, Endo T, et al. Role of Src-family  
628 kinases in formation and trafficking of macropinosomes. *J Cell Physiol.* 2007;211(1):220-32.  
629 Epub 2006/12/15. doi: 10.1002/jcp.20931. PubMed PMID: 17167779.
- 630 31. Racoosin EL, Swanson JA. Macropinosome maturation and fusion with tubular  
631 lysosomes in macrophages. *J Cell Biol.* 1993;121(5):1011-20. Epub 1993/06/01. doi:  
632 10.1083/jcb.121.5.1011. PubMed PMID: 8099075; PubMed Central PMCID: PMCPMC2119679.
- 633 32. Balint E, Lapointe D, Drissi H, van der Meijden C, Young DW, van Wijnen AJ, et al.  
634 Phenotype discovery by gene expression profiling: mapping of biological processes linked to  
635 BMP-2-mediated osteoblast differentiation. *J Cell Biochem.* 2003;89(2):401-26. Epub  
636 2003/04/22. doi: 10.1002/jcb.10515. PubMed PMID: 12704803.
- 637 33. Verdeny-Vilanova I, Wehnekamp F, Mohan N, Sandoval Alvarez A, Borbely JS,  
638 Otterstrom JJ, et al. 3D motion of vesicles along microtubules helps them to circumvent  
639 obstacles in cells. *J Cell Sci.* 2017;130(11):1904-16. Epub 2017/04/20. doi: 10.1242/jcs.201178.  
640 PubMed PMID: 28420672; PubMed Central PMCID: PMCPMC5482975.
- 641 34. Aaron J, Wait E, DeSantis M, Chew TL. Practical Considerations in Particle and Object  
642 Tracking and Analysis. *Curr Protoc Cell Biol.* 2019;83(1):e88. Epub 2019/05/06. doi:  
643 10.1002/cpcb.88. PubMed PMID: 31050869.
- 644 35. Saxton MJ, Jacobson K. Single-particle tracking: applications to membrane dynamics.  
645 *Annu Rev Biophys Biomol Struct.* 1997;26:373-99. Epub 1997/01/01. doi:  
646 10.1146/annurev.biophys.26.1.373. PubMed PMID: 9241424.
- 647 36. Posey D, Blaisdell-Pijuan P, Knoll SK, Saif TA, Ahmed WW. Small-scale displacement  
648 fluctuations of vesicles in fibroblasts. *Scientific reports.* 2018;8(1):13294. Epub 2018/09/07. doi:  
649 10.1038/s41598-018-31656-3. PubMed PMID: 30185883; PubMed Central PMCID:  
650 PMCPMC6125338.
- 651 37. Brangwynne CP, Koenderink GH, MacKintosh FC, Weitz DA. Intracellular transport by  
652 active diffusion. *Trends Cell Biol.* 2009;19(9):423-7. Epub 2009/08/25. doi:  
653 10.1016/j.tcb.2009.04.004. PubMed PMID: 19699642.
- 654 38. Rafiq K, Shashikant T, McManus CJ, Etensohn CA. Genome-wide analysis of the  
655 skeletogenic gene regulatory network of sea urchins. *Development.* 2014;141(4):950-61. Epub  
656 2014/02/06. doi: 10.1242/dev.105585. PubMed PMID: 24496631.
- 657 39. Adomako-Ankomah A, Etensohn CA. Growth factor-mediated mesodermal cell  
658 guidance and skeletogenesis during sea urchin gastrulation. *Development.* 2013;140(20):4214-  
659 25. doi: 10.1242/dev.100479. PubMed PMID: 24026121.
- 660 40. Duloquin L, Lhomond G, Gache C. Localized VEGF signaling from ectoderm to  
661 mesenchyme cells controls morphogenesis of the sea urchin embryo skeleton. *Development.*  
662 2007;134(12):2293-302. Epub 2007/05/18. doi: 10.1242/dev.005108. PubMed PMID: 17507391.
- 663 41. Sun Z, Etensohn CA. Signal-dependent regulation of the sea urchin skeletogenic gene  
664 regulatory network. *Gene Expr Patterns.* 2014;16(2):93-103. doi: 10.1016/j.gep.2014.10.002.  
665 PubMed PMID: 25460514.
- 666 42. Potente M, Gerhardt H, Carmeliet P. Basic and therapeutic aspects of angiogenesis. *Cell.*  
667 2011;146(6):873-87. Epub 2011/09/20. doi: 10.1016/j.cell.2011.08.039. PubMed PMID:  
668 21925313.
- 669 43. Chen BC, Legant WR, Wang K, Shao L, Milkie DE, Davidson MW, et al. Lattice light-sheet  
670 microscopy: imaging molecules to embryos at high spatiotemporal resolution. *Science.*  
671 2014;346(6208):1257998. Epub 2014/10/25. doi: 10.1126/science.1257998. PubMed PMID:  
672 25342811; PubMed Central PMCID: PMCPMC4336192.

- 673 44. de Chaumont F, Dallongeville S, Chenouard N, Herve N, Pop S, Provoost T, et al. Icy: an  
674 open bioimage informatics platform for extended reproducible research. *Nat Methods*.  
675 2012;9(7):690-6. Epub 2012/06/30. doi: 10.1038/nmeth.2075. PubMed PMID: 22743774.
- 676 45. Amat F, Lemon W, Mossing DP, McDole K, Wan Y, Branson K, et al. Fast, accurate  
677 reconstruction of cell lineages from large-scale fluorescence microscopy data. *Nat Methods*.  
678 2014;11(9):951-8. Epub 2014/07/22. doi: 10.1038/nmeth.3036. PubMed PMID: 25042785.
- 679 46. Bray MA, Carpenter AE. CellProfiler Tracer: exploring and validating high-throughput,  
680 time-lapse microscopy image data. *BMC Bioinformatics*. 2015;16:368. Epub 2015/11/06. doi:  
681 10.1186/s12859-015-0759-x. PubMed PMID: 26537300; PubMed Central PMCID:  
682 PMCPMC4634901.
- 683 47. Chenouard N, Smal I, de Chaumont F, Maska M, Sbalzarini IF, Gong Y, et al. Objective  
684 comparison of particle tracking methods. *Nat Methods*. 2014;11(3):281-9. Epub 2014/01/21.  
685 doi: 10.1038/nmeth.2808. PubMed PMID: 24441936; PubMed Central PMCID:  
686 PMCPMC4131736.
- 687 48. Winter MR, Liu M, Monteleone D, Melunis J, Hershberg U, Goderie SK, et al.  
688 Computational Image Analysis Reveals Intrinsic Multigenerational Differences between Anterior  
689 and Posterior Cerebral Cortex Neural Progenitor Cells. *Stem cell reports*. 2015;5(4):609-20. Epub  
690 2015/09/08. doi: 10.1016/j.stemcr.2015.08.002. PubMed PMID: 26344906; PubMed Central  
691 PMCID: PMCPMC4624899.
- 692 49. Winter M, Mankowski W, Wait E, Temple S, Cohen AR. LEVER: software tools for  
693 segmentation, tracking and lineaging of proliferating cells. *Bioinformatics*. 2016;32(22):3530-1.  
694 Epub 2016/07/18. doi: 10.1093/bioinformatics/btw406. PubMed PMID: 27423896; PubMed  
695 Central PMCID: PMCPMC5181556.
- 696 50. Heddleston JM, Chew TL. Light sheet microscopes: Novel imaging toolbox for visualizing  
697 life's processes. *Int J Biochem Cell Biol*. 2016;80:119-23. Epub 2016/10/31. doi:  
698 10.1016/j.biocel.2016.10.002. PubMed PMID: 27725275.
- 699 51. Engler AJ, Sen S, Sweeney HL, Discher DE. Matrix elasticity directs stem cell lineage  
700 specification. *Cell*. 2006;126(4):677-89. Epub 2006/08/23. doi: 10.1016/j.cell.2006.06.044.  
701 PubMed PMID: 16923388.
- 702 52. Hanjaya-Putra D, Yee J, Ceci D, Truitt R, Yee D, Gerecht S. Vascular endothelial growth  
703 factor and substrate mechanics regulate in vitro tubulogenesis of endothelial progenitor cells. *J  
704 Cell Mol Med*. 2010;14(10):2436-47. Epub 2009/12/09. doi: 10.1111/j.1582-4934.2009.00981.x.  
705 PubMed PMID: 19968735; PubMed Central PMCID: PMCPMC3823161.
- 706 53. Hodor PG, Illies MR, Broadley S, Ettensohn CA. Cell-substrate interactions during sea  
707 urchin gastrulation: migrating primary mesenchyme cells interact with and align extracellular  
708 matrix fibers that contain ECM3, a molecule with NG2-like and multiple calcium-binding  
709 domains. *Dev Biol*. 2000;222(1):181-94. Epub 2000/07/08. doi: 10.1006/dbio.2000.9696.  
710 PubMed PMID: 10885756.
- 711 54. Winter MR, Fang C, Banker G, Roysam B, Cohen AR. Axonal transport analysis using  
712 Multitemporal Association Tracking. *Int J Comput Biol Drug Des*. 2012;5(1):35-48. Epub  
713 2012/03/23. doi: 10.1504/IJCBD.2012.045950. PubMed PMID: 22436297; PubMed Central  
714 PMCID: PMCPMC3380808.
- 715 55. Potokar M, Kreft M, Pangrsic T, Zorec R. Vesicle mobility studied in cultured astrocytes.  
716 *Biochem Biophys Res Commun*. 2005;329(2):678-83. Epub 2005/03/02. doi:  
717 10.1016/j.bbrc.2005.02.030. PubMed PMID: 15737639.
- 718 56. Potokar M, Kreft M, Li L, Daniel Andersson J, Pangrsic T, Chowdhury HH, et al.  
719 Cytoskeleton and vesicle mobility in astrocytes. *Traffic*. 2007;8(1):12-20. Epub 2007/01/19. doi:  
720 10.1111/j.1600-0854.2006.00509.x. PubMed PMID: 17229312.

- 721 57. Balint S, Verdeny Vilanova I, Sandoval Alvarez A, Lakadamyali M. Correlative live-cell and  
722 superresolution microscopy reveals cargo transport dynamics at microtubule intersections. *Proc*  
723 *Natl Acad Sci U S A*. 2013;110(9):3375-80. Epub 2013/02/13. doi: 10.1073/pnas.1219206110.  
724 PubMed PMID: 23401534; PubMed Central PMCID: PMC3587250.
- 725 58. Domanska MK, Kiessling V, Stein A, Fasshauer D, Tamm LK. Single vesicle millisecond  
726 fusion kinetics reveals number of SNARE complexes optimal for fast SNARE-mediated membrane  
727 fusion. *J Biol Chem*. 2009;284(46):32158-66. Epub 2009/09/18. doi: 10.1074/jbc.M109.047381.  
728 PubMed PMID: 19759010; PubMed Central PMCID: PMC2797286.
- 729 59. Rouso T, Schejter ED, Shilo BZ. Orchestrated content release from *Drosophila* glue-  
730 protein vesicles by a contractile actomyosin network. *Nat Cell Biol*. 2016;18(2):181-90. Epub  
731 2015/12/08. doi: 10.1038/ncb3288. PubMed PMID: 26641716.
- 732 60. Segal D, Zaritsky A, Schejter ED, Shilo BZ. Feedback inhibition of actin on Rho mediates  
733 content release from large secretory vesicles. *J Cell Biol*. 2018;217(5):1815-26. Epub  
734 2018/03/03. doi: 10.1083/jcb.201711006. PubMed PMID: 29496739; PubMed Central PMCID:  
735 PMC5940311.
- 736 61. Hu MY, Yan JJ, Petersen I, Himmerkus N, Bleich M, Stumpp M. A SLC4 family bicarbonate  
737 transporter is critical for intracellular pH regulation and biomineralization in sea urchin embryos.  
738 *eLife*. 2018;7. Epub 2018/05/02. doi: 10.7554/eLife.36600. PubMed PMID: 29714685; PubMed  
739 Central PMCID: PMC5986267.
- 740 62. Rothman JS, Kocsis L, Herzog E, Nusser Z, Silver RA. Physical determinants of vesicle  
741 mobility and supply at a central synapse. *eLife*. 2016;5. Epub 2016/08/20. doi:  
742 10.7554/eLife.15133. PubMed PMID: 27542193; PubMed Central PMCID: PMC5025287.
- 743 63. Salerno M, Dante S, Patra N, Diaspro A. AFM measurement of the stiffness of layers of  
744 agarose gel patterned with polylysine. *Microsc Res Tech*. 2010;73(10):982-90. Epub 2010/03/17.  
745 doi: 10.1002/jemt.20838. PubMed PMID: 20232377.
- 746 64. Xue C, Zhang T, Xie X, Zhang Q, Zhang S, Zhu B, et al. Substrate stiffness regulates  
747 arterial-venous differentiation of endothelial progenitor cells via the Ras/Mek pathway. *Biochim*  
748 *Biophys Acta Mol Cell Res*. 2017;1864(10):1799-808. Epub 2017/07/25. doi:  
749 10.1016/j.bbamcr.2017.07.006. PubMed PMID: 28732675.
- 750 65. Smith Q, Chan XY, Carmo AM, Trempel M, Saunders M, Gerecht S. Compliant  
751 substratum guides endothelial commitment from human pluripotent stem cells. *Sci Adv*.  
752 2017;3(5):e1602883. Epub 2017/06/06. doi: 10.1126/sciadv.1602883. PubMed PMID: 28580421;  
753 PubMed Central PMCID: PMC5451190.
- 754 66. Sepulveda-Ramirez SP, Toledo-Jacobo L, Henson JH, Shuster CB. Cdc42 controls primary  
755 mesenchyme cell morphogenesis in the sea urchin embryo. *Dev Biol*. 2018;437(2):140-51. Epub  
756 2018/03/21. doi: 10.1016/j.ydbio.2018.03.015. PubMed PMID: 29555242; PubMed Central  
757 PMCID: PMC5973877.
- 758 67. Croce J, Duloquin L, Lhomond G, McClay DR, Gache C. Frizzled5/8 is required in  
759 secondary mesenchyme cells to initiate archenteron invagination during sea urchin  
760 development. *Development*. 2006;133(3):547-57. doi: 10.1242/dev.02218. PubMed PMID:  
761 16396908.
- 762 68. Simao AMS, Bolean M, Favarin BZ, Veschi EA, Tovani CB, Ramos AP, et al. Lipid  
763 microenvironment affects the ability of proteoliposomes harboring TNAP to induce  
764 mineralization without nucleators. *J Bone Miner Metab*. 2019;37(4):607-13. Epub 2018/10/17.  
765 doi: 10.1007/s00774-018-0962-8. PubMed PMID: 30324534; PubMed Central PMCID:  
766 PMC6465158.

767 69. Wait E, Winter M, Cohen AR. Hydra image processor: 5-D GPU image analysis library  
768 with MATLAB and python wrappers. *Bioinformatics*. 2019;35(24):5393-5. Epub 2019/06/27. doi:  
769 10.1093/bioinformatics/btz523. PubMed PMID: 31240306.

770 70. Winter M. Source code for analyses described in "Dynamics and molecular control of  
771 calcium-vesicle motion during sea urchin skeletogenesis revealed by 4D lattice-light-sheet-  
772 microscopy" 2020. Available from: [https://git-bioimage.coe.drexel.edu/opensource/lism-  
773 calcium-vesicles-lever](https://git-bioimage.coe.drexel.edu/opensource/lism-calcium-vesicles-lever).

774

775



776 **Figures**

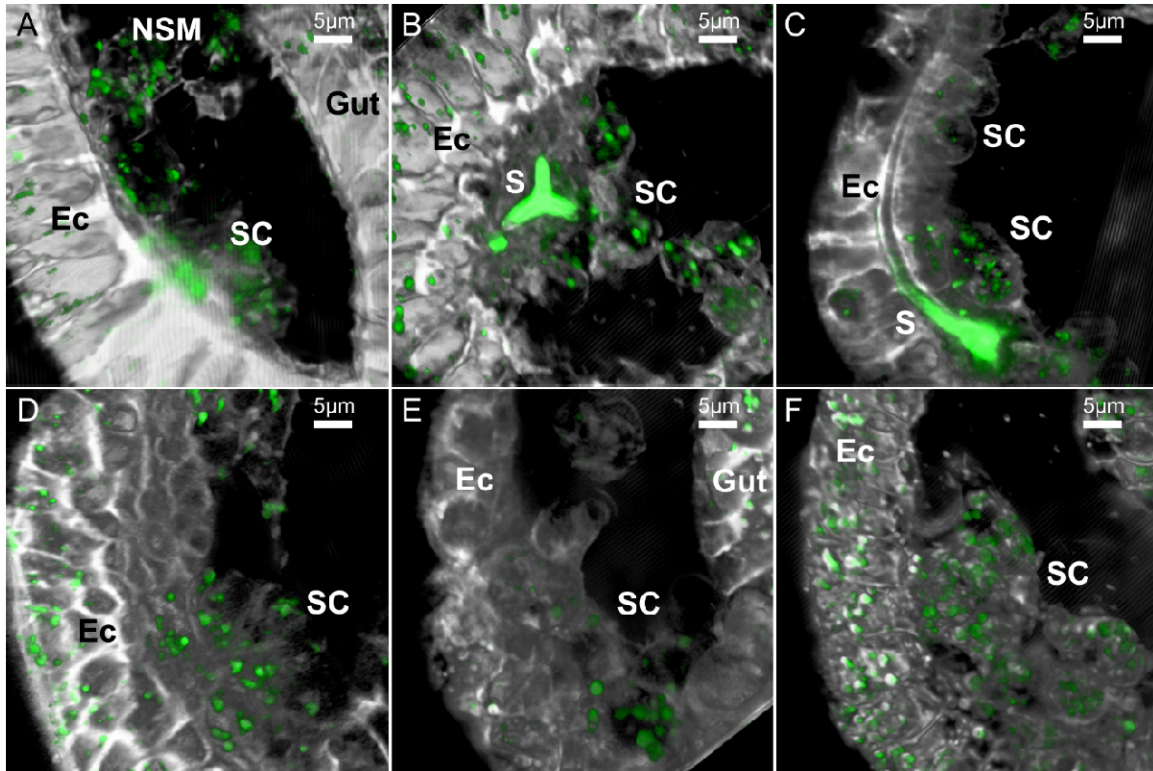

777

778 **Figure 1 Examples of the LLSM 3D images of sea urchin embryos in different**  
779 **developmental stages and treatments.** These representative images are 2D projections of the 3D  
780 rendered frames of selected datasets. Calcein staining is marked in green and the FM4-64  
781 membrane staining is marked in gray. (A-C), control embryos (DMSO) at the early gastrula stage  
782 before spicule formation (A), just after the tri-radiate spicule forms (B) and when the spicule is  
783 elongated (C). (D-F) Representative embryos at gastrula stage treated with VEGFR inhibitor,  
784 axitinib, do not have spicules while embryos in a similar stage have elongated spicule. Scale bars  
785 are 5µm. 3D movies showing the first 100-200 frames of each of the dataset presented in this  
786 figure are provided as movies S1-6. Ec – ectoderm, SC – skeletogenic cells, NSM- non-  
787 skeletogenic mesoderm, S – spicule.

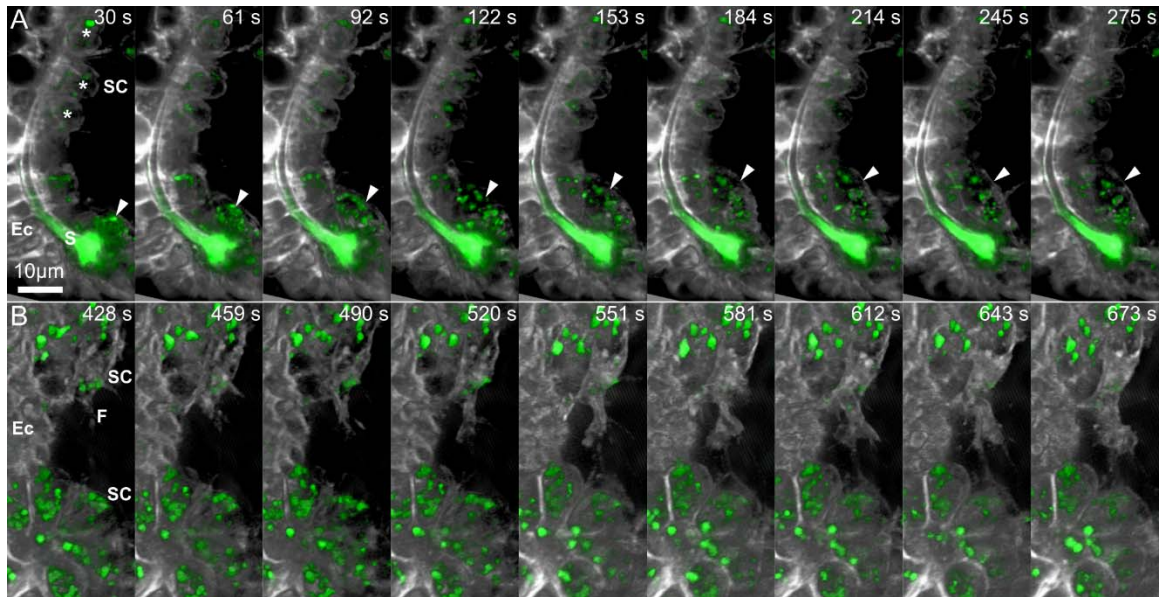

788

789 **Figure 2 Sequences of time-lapse images demonstrating cellular dynamics in control and**  
790 **under VEGFR inhibition.** (A) Time-lapse images of control embryo (sup movie 3) showing the  
791 rapid movement of a free mesenchymal cell (marked in arrowhead) compared to the stable  
792 position of the skeletogenic cells that are in direct contact with the ectoderm (asterisks). (B)  
793 Time lapse images of an embryo grown under VEGFR inhibition demonstrating the active  
794 filopodia extension and fusion between two skeletogenic cell clusters. Relative time from the  
795 beginning of the movie is shown in seconds at the top of each frame. Scale bar is 10μm. Ec –  
796 ectoderm, S – spicule, SC – skeletogenic cell, F - Filopodia.

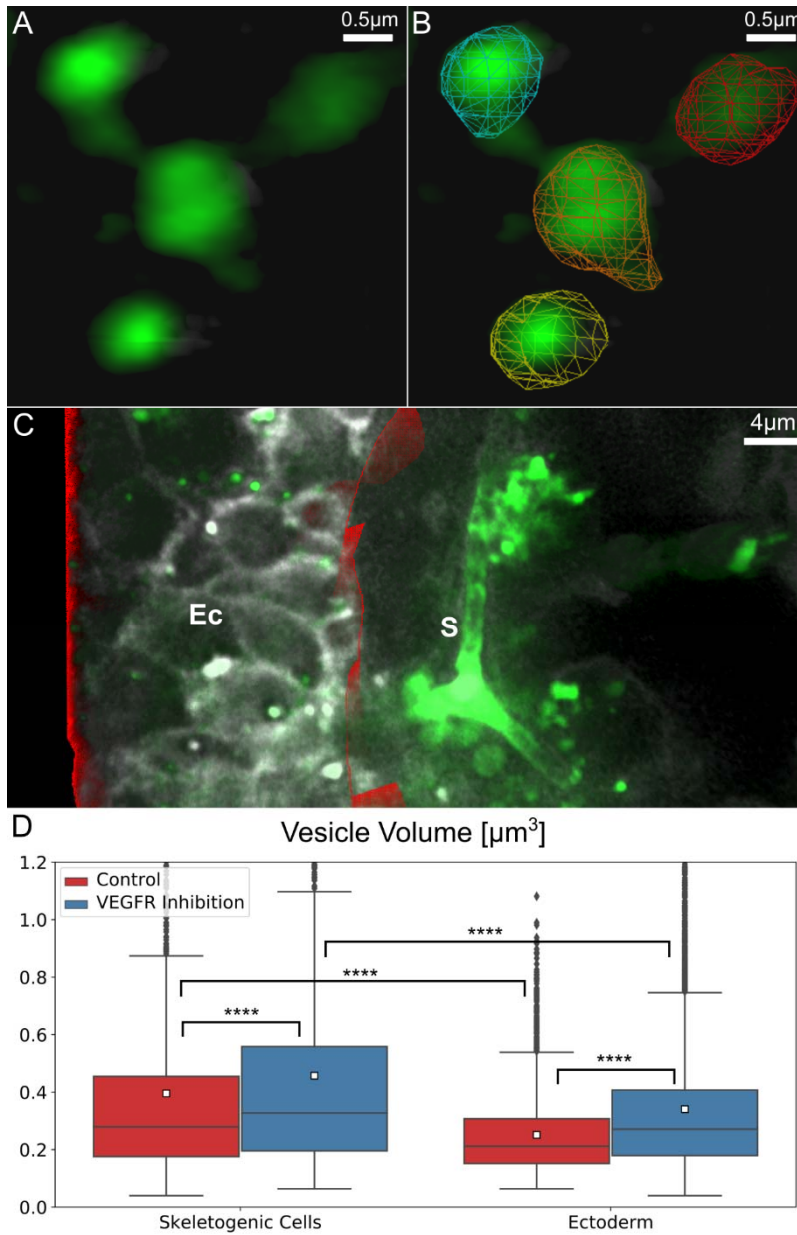

797

798 **Figure 3 Vesicle volume is larger in the skeletogenic cells compared to the ectodermal cells**  
799 **and is significantly larger under VEGFR inhibition.** (A-C) An example for the image  
800 processing involved in the quantification of vesicle volume in the ectodermal vs. skeletogenic  
801 embryonic domains. (A) Raw image rendering of calcium vesicle detection. (B) Demonstration of  
802 the automated vesicle detection (segmentation) overlaid on the image in (A). (C) Manual  
803 identification of ectodermal region in red, rendered along with raw image frame. (D) Comparison  
804 of vesicle sizes in ectodermal and skeletogenic cells in control and VEGFR inhibition. Each box  
805 plot shows the average (white square), median (middle line), the first and the third quartiles (the  
806 25<sup>th</sup> and 75<sup>th</sup> percentiles, edges of boxes) skeletogenic cells compared to the ectodermal cells in  
807 all treatments and VEGFR inhibition significantly increases vesicle volume in the skeletogenic  
808 and the ectodermal cells. (Dunn-Sidak test,  $p < 0.0001$ , exact p-values are given in Dataset S1).

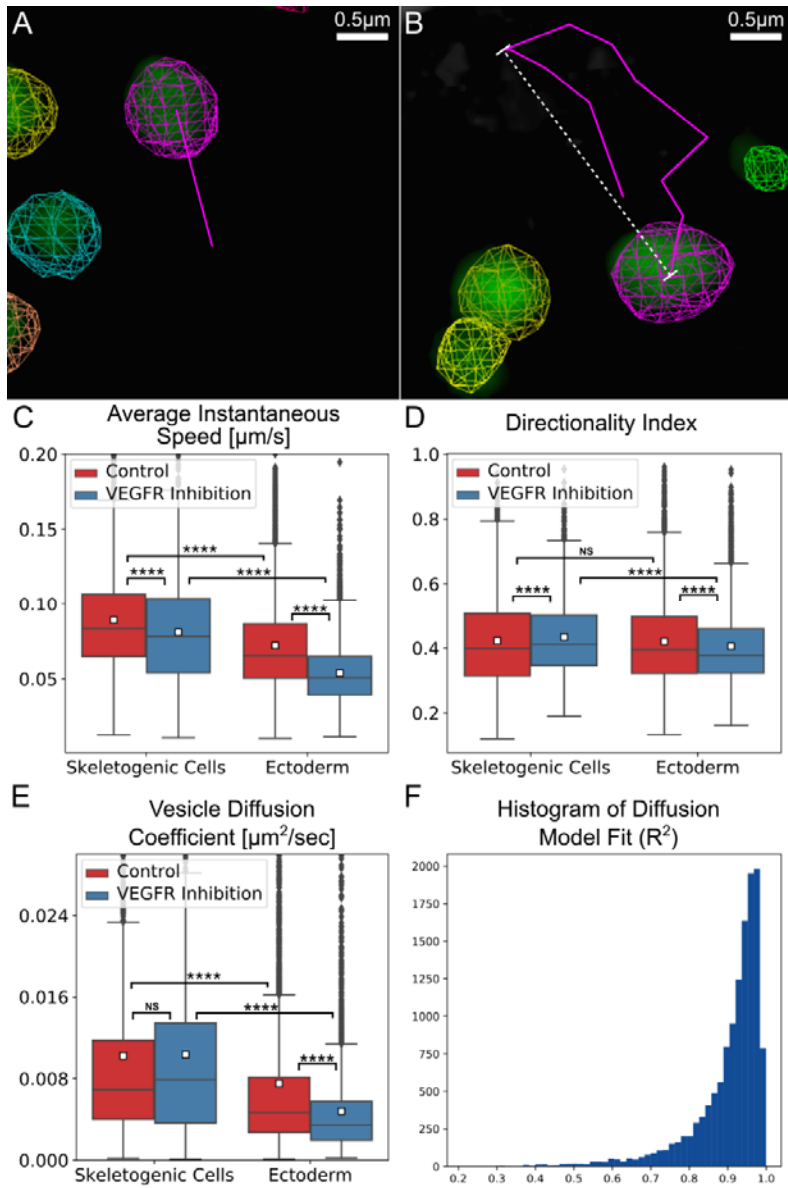

809

810 **Figure 4 Vesicle tracking reveals an active diffusion motion with higher diffusion coefficient**  
811 **and speed in the skeletogenic cells compared to the ectodermal cells.** (A, B) Examples for the  
812 automated tracking used to quantify vesicle kinetics. (A) Instantaneous speed indicates the  
813 distance traveled between sequential frames divided by the time interval between the frame. The  
814 magenta line demonstrates this distance for the magenta labeled vesicle. (B) Directionality index  
815 is the ratio of maximal displacement (white line) over the total distance traveled (magenta line)  
816 within a one-minute time interval. A representative 3D movie of tracking session is provided in  
817 movie S7. (C-E) Comparison of vesicle motion statistics between control and VEGFR inhibited  
818 embryos. Each box plot shows the average (white square), median (middle line), the first and the  
819 third quartiles (the 25<sup>th</sup> and 75<sup>th</sup> percentiles, edges of boxes) and outliers. (C) Vesicle  
820 instantaneous speed. (D) Directionality index. (E) Vesicle diffusion coefficient. (Dunn-Sidak test,  
821  $p < 0.0001$ , exact p-values are given in Dataset S1). (F) Histogram of Diffusion model fit, 90% of  
822 vesicle tracks are well modeled by the standard diffusion model ( $R^2 > 0.8$ ).

823

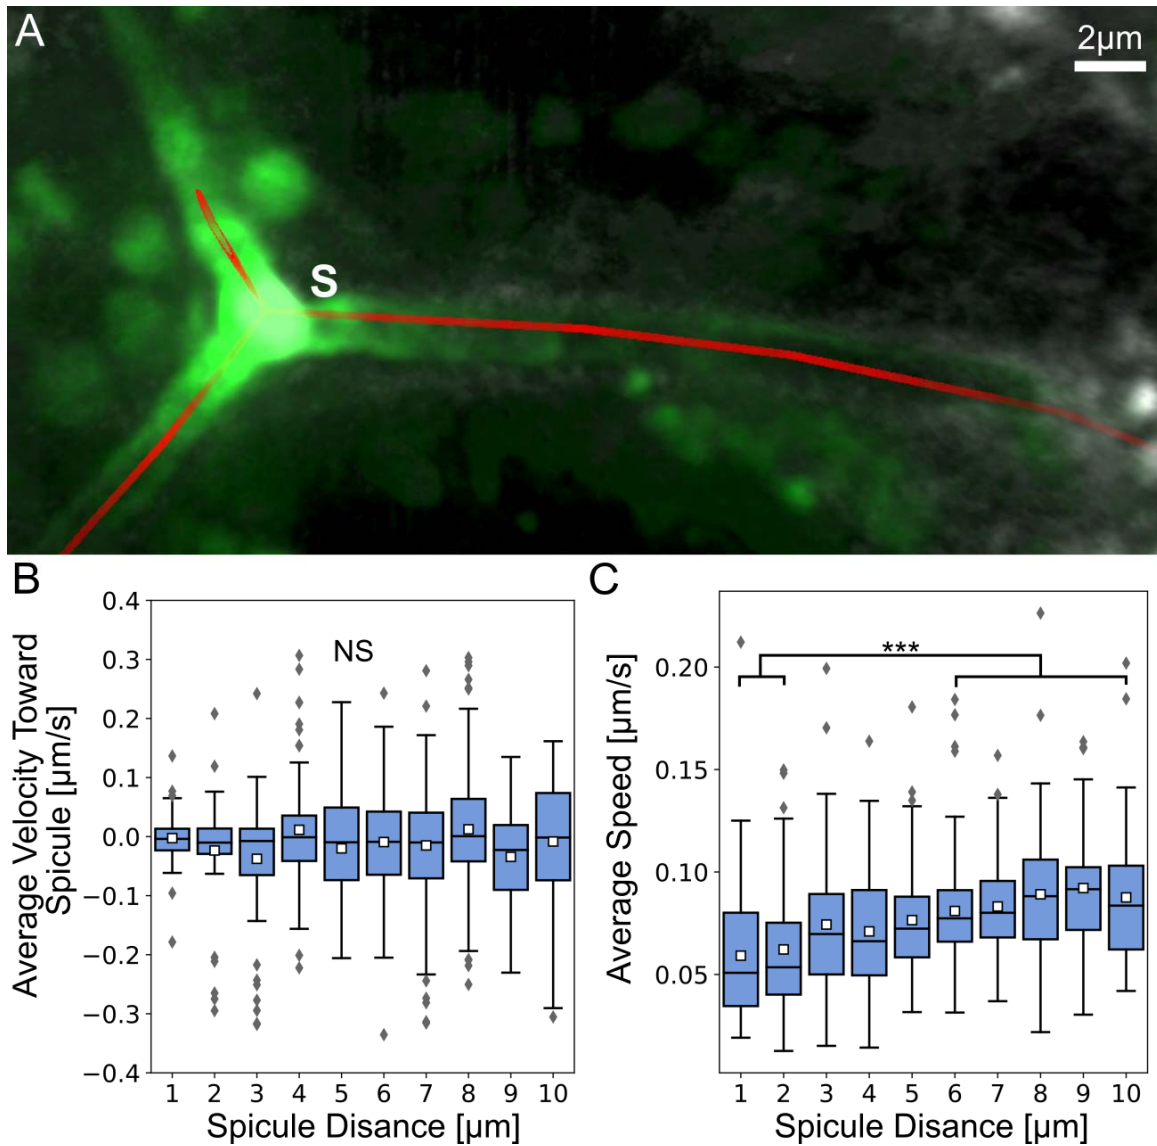

824

825 **Figure 5 Vesicle velocity is not directed toward the spicule but vesicle speed is lower near**  
826 **the spicule.** (A) An example for the manually identified spicule centerline shown in red with raw  
827 image data. (B) Average instantaneous velocity ( $\mu\text{m}/\text{sec}$ ) toward the spicule relative to the  
828 average distance from spicule. Each box plot shows the average (white square) median (middle  
829 line), the first and the third quartiles (the 25<sup>th</sup> and 75<sup>th</sup> percentiles, edges of boxes) and outliers.  
830 (C) Average instantaneous vesicle speed ( $\mu\text{m}/\text{sec}$ ) at increasing average distances from the  
831 spicule ( $\mu\text{m}$ ). The speed at distances 1-2 $\mu\text{m}$  are significantly lower than at distances >6 $\mu\text{m}$   
832 (Dunn-Sidak test,  $p < 0.001$ , exact p-values are given in Dataset S1).

833

834

835

836

837 **Acknowledgements**

838 We thank the advanced imaging center at Jenelia research campus for their instrumental help with  
839 using the LLSM and in animal maintenance. Specifically, we thank Teng-Leong Chew and John  
840 Heddleston for the help with the LLSM, Satya Kuhn for help with animals and reagents and Eric  
841 Wait for helpful discussions regarding data analysis. We thank Yarden Ben-Tabou de-Leon for  
842 the illustration of the graphical abstract. This work was supported by the Israel Science  
843 Foundation grant number 41/14 (S.B.D.), Zuckerman fellowship (M.R.W.) and ISEF fellowship  
844 (M.M.).

845 **Author contributions**

846 S.B.D., M.M. and T.G. designed the project. M.M. and S.B.D. performed the LLSM experiments.  
847 A.C. and M.R.W. developed visualization, tracking and segmentation tools. M.R.W. analyzed the  
848 LLSM data. S.B.D., M.R.W., M.M. and T.G. interpreted the analyses results. S.B.D. and M.R.W.  
849 wrote the paper with significant help from M.M. and T.G. and A.C.

850 **Author information**

851 The authors declare no competing financial interests. Correspondence and request for materials  
852 should be addressed to Smadar Ben-Tabou de-Leon ([sben-tab@univ.haifa.ac.il](mailto:sben-tab@univ.haifa.ac.il))

853

854
